# Supplementary material
Source: publisher site journal article supplement (https://www.dovepress.com/article/254985)
Supplement: Supplementary file 1 [file get_supplementary_file.php]

**Supplementary Figure 1. The correlation of HSP70 family members with *CD163* and *CD206* in primary tumor cases in TCGA-HNSC**


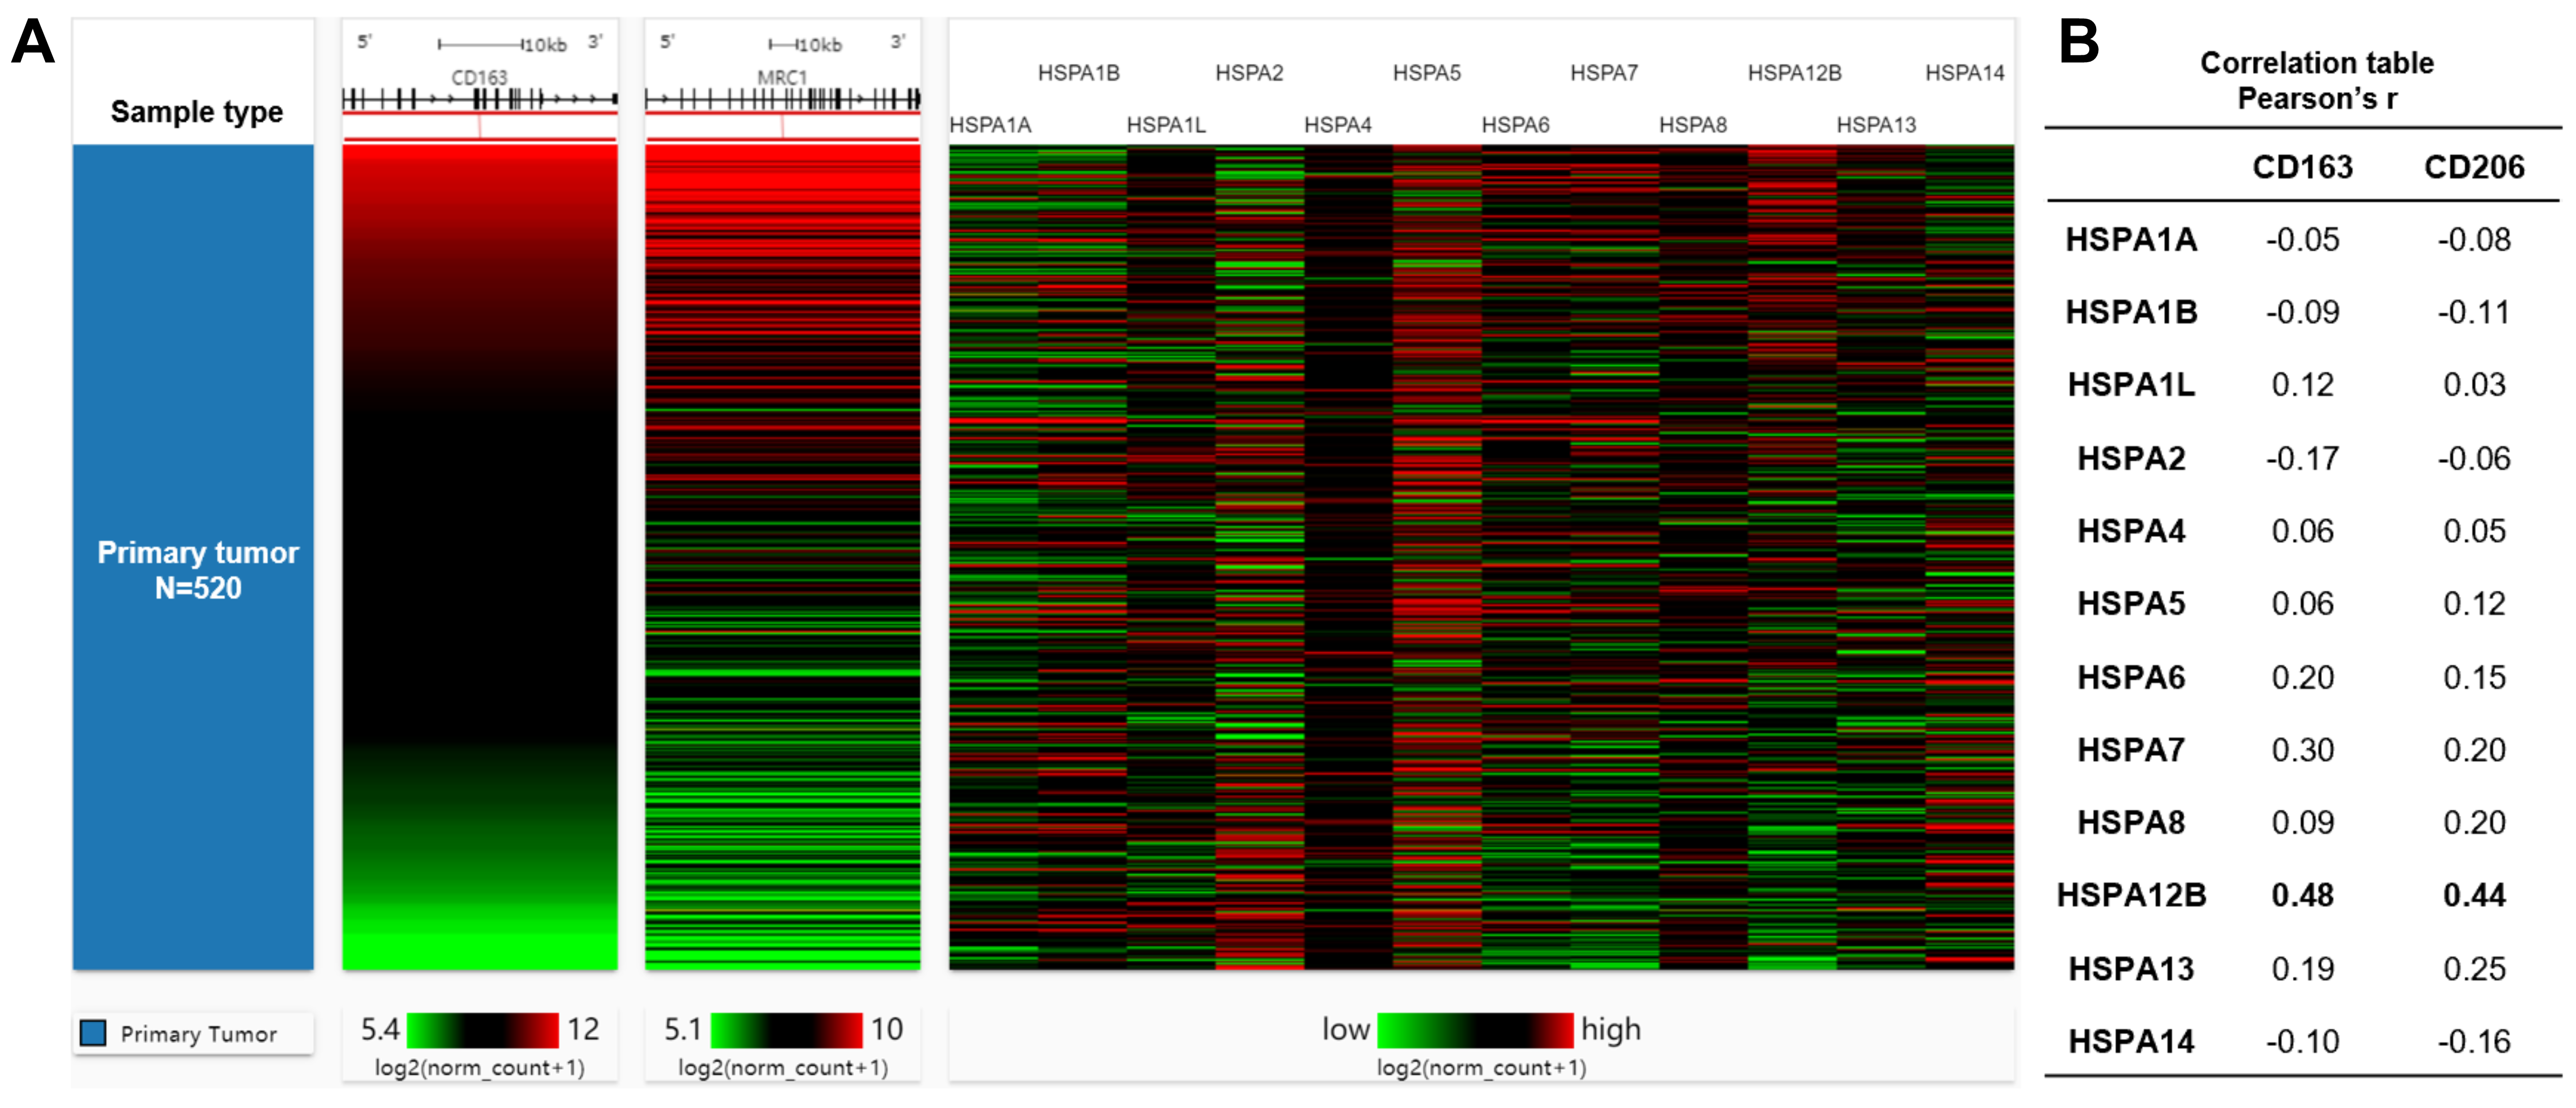


**A-B.** A heatmap (A) and plot charts (B) showing the correlation of HSP70 family members with *CD163* and *CD206* in primary tumor cases (N=520) in TCGA-HNSC.
